# Supplementary material
Source: publisher site journal article supplement (https://www.dovepress.com/article/348490)
Supplement: Supplementary file 1 [file get_supplementary_file.php]

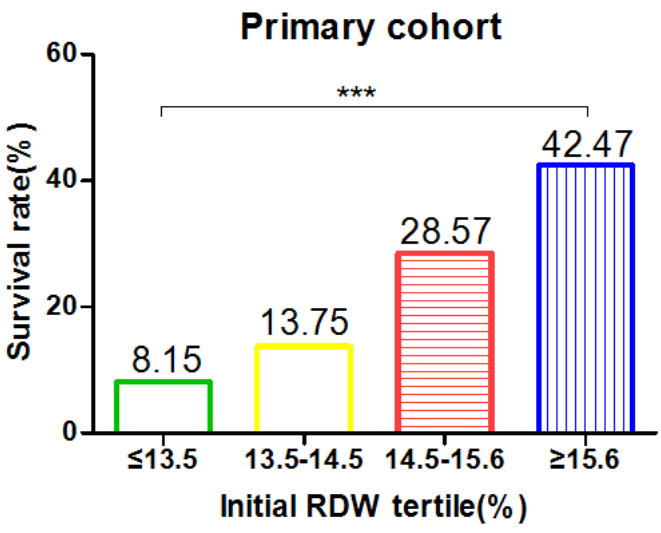

a

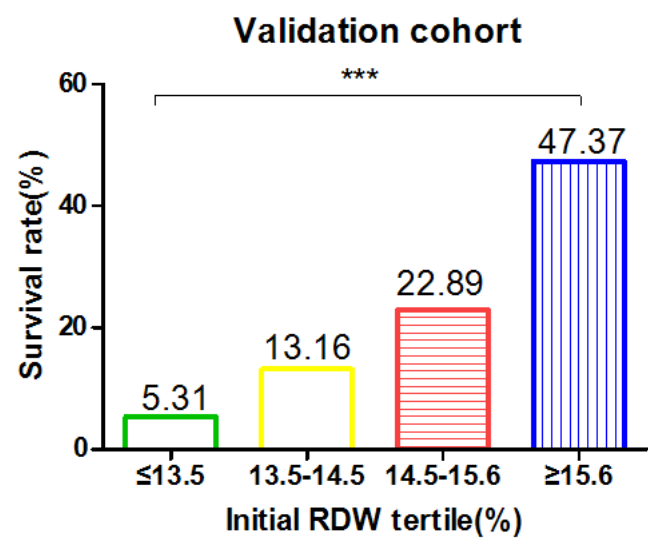

b

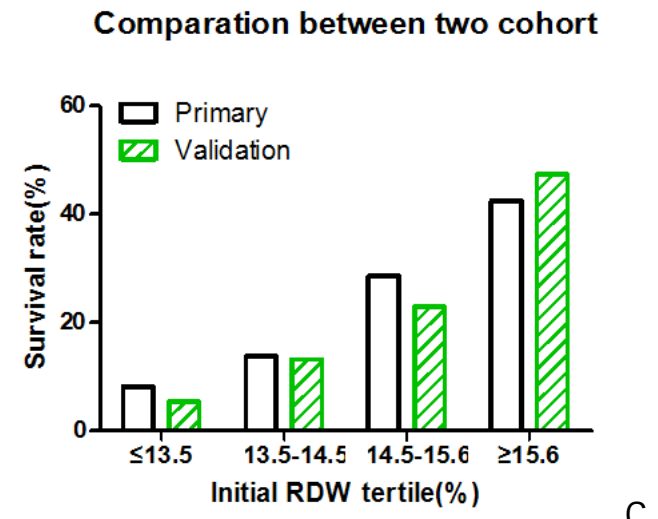

c

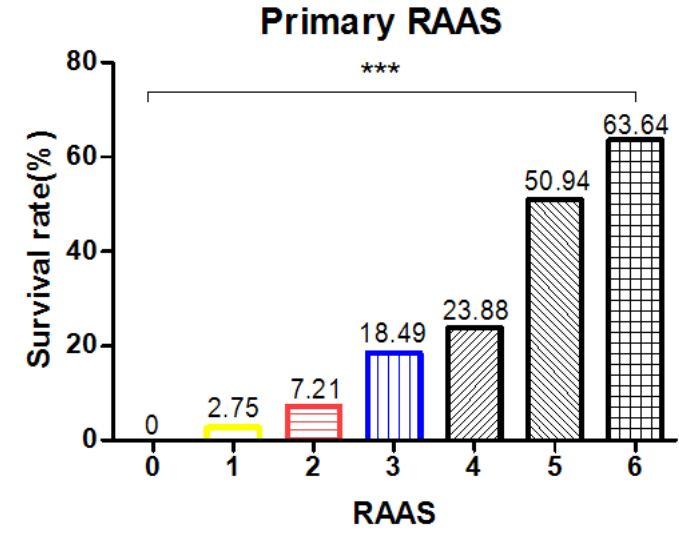

d

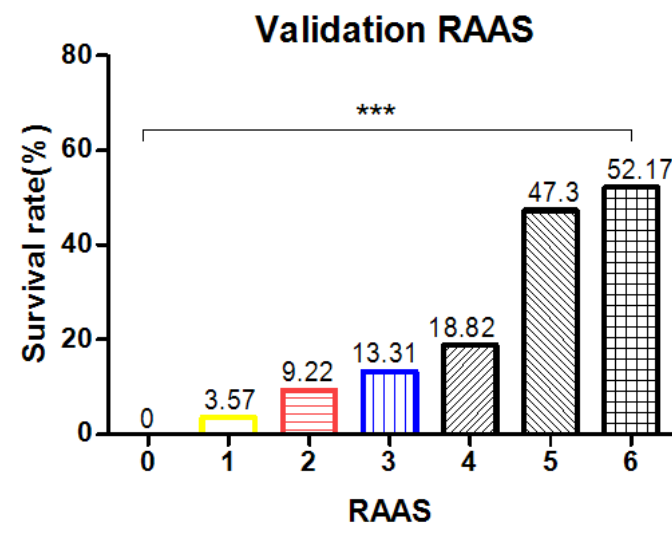

e

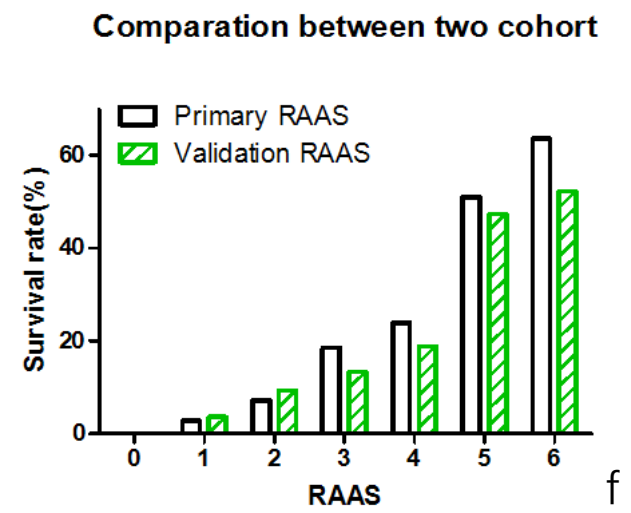

f

\*\*\*  $P < 0.05$

Supplementary Figure 1. The survival rates of RDW and RAAS segments were compared between the primary and validation cohorts, followed by no significant difference in survival rates between the two validated cohorts after RDW and RAAS segments ( $p < 0.05$ ).

Supplementary Table 1. Assignment and segmentation of the RAAS scoring system and RDW

|                     |                |   |         |     |                |             |   |              |
|---------------------|----------------|---|---------|-----|----------------|-------------|---|--------------|
| RAAS scoring system | RDW            | 3 | group-1 | 0-1 | RDW subsection | $\leq 13.4$ | 0 | subsection-1 |
|                     | SOFA>2         | 1 | group-2 | 2-3 |                | 13.5-14.4   | 1 | subsection-2 |
|                     | Age > 72.5     | 1 | group-3 | 4-5 |                | 14.5-15.4   | 2 | subsection-3 |
|                     | APACHE II>18.5 | 1 | group-4 | 6   |                | $\geq 15.5$ | 3 | subsection-4 |

RDW can assign different 0-3 points through quartet. The reason for choosing SOFA score greater than 2 as the assignment standard, rather than the cutoff value is: if the CUTOFF value of SOFA (5.5) in this paper is used for assignment, the number of patients meeting the standard is very small, which will lead to the practicability of the whole score is not strong, the prognostic ability deviation, and the results are meaningless. Physiological variables were scored accordingly, which were divided into 7 levels according to the assignment of parameters.

Supplementary Table 2. the mortality rate of two cohort in each group

2-1

|                   | mortality rate (%) |         |         |         |
|-------------------|--------------------|---------|---------|---------|
|                   | group-1            | group-2 | group-3 | group-4 |
| primary cohort    | 4.5                | 30.4    | 53.3    | 81.8    |
| validation cohort | 9.4                | 25.1    | 47.5    | 84.0    |

2-2

|                   | mortality rate |        |        |        |        |        |        |
|-------------------|----------------|--------|--------|--------|--------|--------|--------|
|                   | RAAS=0         | RAAS=1 | RAAS=2 | RAAS=3 | RAAS=4 | RAAS=5 | RAAS=6 |
| primary cohort    | 2.1            | 5.6    | 21.1   | 39.3   | 41.3   | 65.5   | 81.8   |
| validation cohort | 4.2            | 10.6   | 17.8   | 34.0   | 37.3   | 59.7   | 84.0   |

Supplementary Table 3. Comparison of demographics and baseline clinical data between the RAAS primary group and the RAAS validation group

| Demographics                            | Primary cohort | Validation cohort | <i>p</i> |
|-----------------------------------------|----------------|-------------------|----------|
| Number ( <i>n</i> )                     | 529            | 537               |          |
| Male [ <i>n</i> (%)]                    | 320(60.5)      | 301(56.1)         | 0.142    |
| Hospital time (day, $x\pm s$ )          | 11.7 $\pm$ 8.4 | 11.0 $\pm$ 6.6    | 0.105    |
| Age [years, M(Q)]                       | 70.1(62-82)    | 75.2(68-83)       | 0.001    |
| APACHE II ( $x\pm s$ )                  | 15.4 $\pm$ 8.1 | 14.6 $\pm$ 7.3    | 0.692    |
| SOFA ( $x\pm s$ )                       | 5.3 $\pm$ 3.2  | 4.7 $\pm$ 3.1     | 0.086    |
| Cardiovascular disease [ <i>n</i> (%)]  | 178(33.6)      | 253(47.1)         | 0.000    |
| ACS [ <i>n</i> (%)]                     | 67(12.7)       | 35(6.5)           |          |
| CAD [ <i>n</i> (%)]                     | 114(21.6)      | 249(46.4)         |          |
| Kidney disease [ <i>n</i> (%)]          | 162(30.6)      | 249(46.4)         | 0.000    |
| AKI [ <i>n</i> (%)]                     | 119(22.5)      | 118(22.0)         |          |
| CKD [ <i>n</i> (%)]                     | 43(8.1)        | 170(31.7)         |          |
| Hypertension [ <i>n</i> (%)]            | 252(47.6)      | 299(55.7)         | 0.009    |
| Diabetes [ <i>n</i> (%)]                | 193 (36.5)     | 191(35.6)         | 0.756    |
| Mechanical ventilation [ <i>n</i> (%)]  | 118(22.3)      | 90(16.8)          | 0.304    |
| CRRT [ <i>n</i> (%)]                    | 57(10.8)       | 320(60.5)         | 0.025    |
| RDW admission, ( $x\pm s$ )             | 14.0 $\pm$ 1.5 | 14.3 $\pm$ 2.0    | 0.013    |
| 30 days mortality [ <i>n</i> (%)]       | 90(17.0)       | 95(17.7)          | 0.094    |
| <b>Source of infection</b>              |                |                   |          |
| Lower respiratory [ <i>n</i> (%)]       | 232 (43.9 %)   | 259 (48.2 %)      |          |
| Urogenital [ <i>n</i> (%)]              | 98 (18.5 %)    | 85 (15.3 %)       |          |
| Intra-abdominal [ <i>n</i> (%)]         | 174 (32.9 %)   | 177 (33.0 %)      |          |
| Catheter-related device [ <i>n</i> (%)] | 1 (0.2 %)      | 0 (0.0 %)         |          |
| Blood stream [ <i>n</i> (%)]            | 5 (0.9 %)      | 4 (0.7 %)         |          |
| Skin-soft tissues [ <i>n</i> (%)]       | 7 (1.3 %)      | 3 (0.6 %)         |          |
| Intracerebral infection [ <i>n</i> (%)] | 2 (0.4 %)      | 8 (1.5 %)         |          |
| Other unknown [ <i>n</i> (%)]           | 10 (1.9 %)     | 4 (0.7 %)         |          |

|   | features VIF Factor | features  |
|---|---------------------|-----------|
| 0 | 1.2                 | RDW       |
| 1 | 4.0                 | AGE       |
| 2 | 2.4                 | APACHE II |
| 3 | 2.6                 | SOFA      |

Supplementary table 4. The closer the VIF (variance inflation factor value) is close to 5, the lighter the multiple copies. The larger the VIF is, the smaller the tolerance of the independent variable is, and the more collinearity there is. When multiple coordinates are serious, appropriate methods should be adjusted.
